# Supplementary material
Source: Springer Nature journal article supplement (https://www.springermedizin.de/resource/supplementary/12871_2014_301_MOESM1_ESM.pdf/9429304)

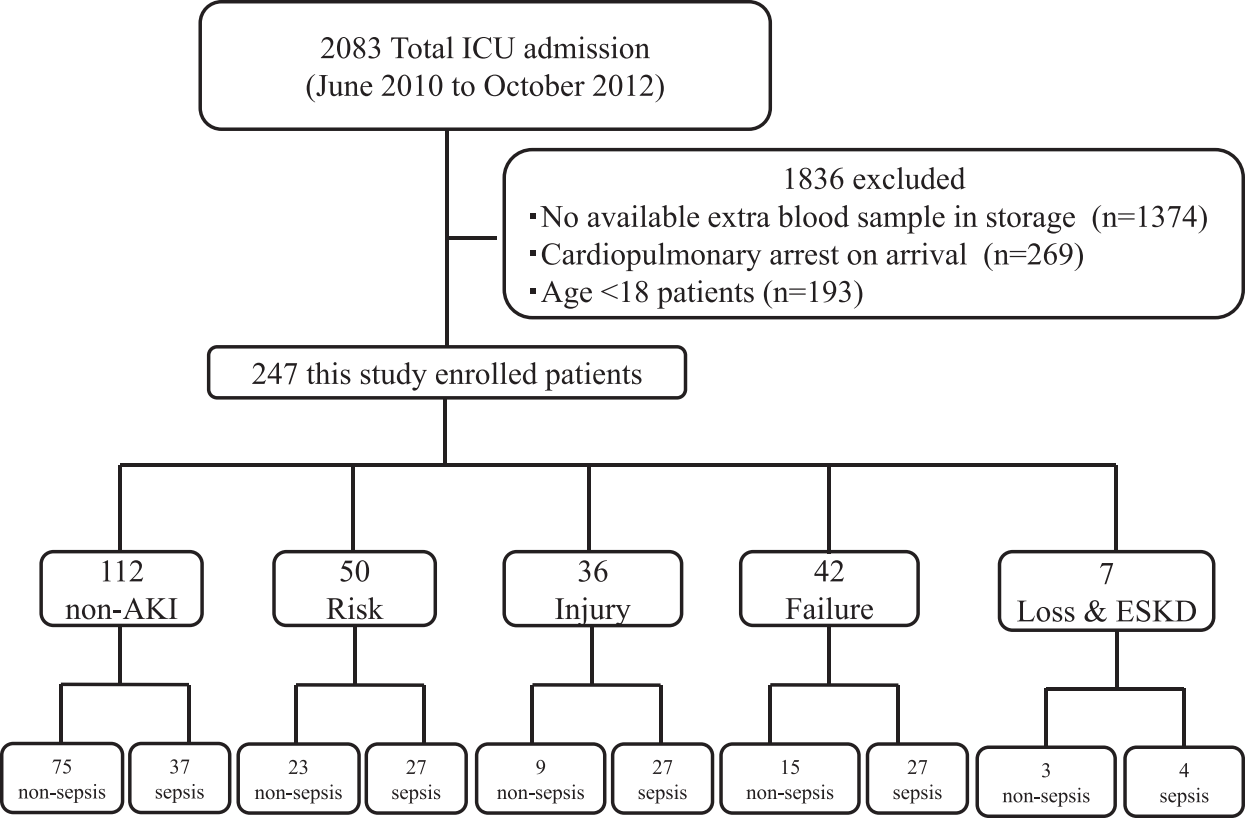

Supplement: MOESM1 [file 9429304]
